# Supplementary material for: Dictyota defense: Developing effective chemical protection against intense fish predation for outplanted massive corals
Source: PeerJ. 2023 Mar 8;11:e14995. doi: 10.7717/peerj.14995 (PMC10007969; doi:10.7717/peerj.14995)
Supplement: Supplemental Information 5 — These data represent the final lipid content of the coral tissue samples among the different treatment types. Lipid content was calculated from the resulting values of the filtration process using the equations provided by ThermoScientific. [file peerj-11-14995-s005.xlsx]

## Sheet: lipid data
sample #	blastate vol (mL)	filter initial	filter final	skel initial	skel final	lipid initial	lipid final	Notes
initial 1	43	0.1024	0.1148	1.114	1.2609	10.9683	10.9811	10/20/21 start baking at 3pm
initial 2	45	0.1021	0.1183	1.3146	1.4896	11.0237	11.0339	10/25/21 removed from oven
initial 3	50	0.1033	0.1268	1.4907	1.6657	11.0123	11.0255
initial 4	43	0.1032	0.1231	1.756	1.9186	10.7857	10.7978
initial 5	50	0.1023	0.1238	1.5247	1.6721	11.0652	11.0802
dict 1	53	0.1031	0.1174	2.7518	3.0283	11.0593	11.0847
dict 2	53	0.1019	0.1188	3.4581	3.7358	11.1228	11.143
dict 3	55	0.1041	0.1209	2.8146	3.0729	10.977	10.9881
dict 4	55	0.1039	0.1214	2.6217	2.8663	10.9353	11.1091
dict 5	52	0.1038	0.1283	1.5467	1.7694	10.8127	10.8257	very green
starve 1	53	0.102	0.1229	3.2877	3.5936	11.0067	11.0155
starve 2	50	0.1044	0.1255	2.505	2.7259	10.9723	10.9841
starve 3	50	0.1023	0.128	1.6759	1.8047	10.9828	11.0184
starve 4	50	0.1031	0.1211	1.2449	1.4194	11.0112	11.0171
starve 5	50	0.1051	0.1224	1.9847	2.1576	10.8801	10.8945
fed 1	46	0.0995	0.1124	2.4123	2.6279	10.8701	10.877
fed 2	52	0.0998	0.1227	4.5858	4.8714	11.1427	11.1549
fed 3	50	0.0999	0.1192	1.5104	1.7021	10.9569	10.9651
fed 4	55	0.0999	0.1166	3.2987	3.5787	10.8024	10.8098
fed 5	50	0.0991	0.114	2.7891	3.0214	10.9277	10.9367
nurse 1	55	0.1002	0.1245	2.8453	3.0884	10.7902	10.8064
nurse 2	55	0.0996	0.1253	2.7693	3.0367	10.9199	10.9343
nurse 3	55	0.0993	0.12	1.9782	2.2034	10.7151	10.7263
nurse 4	52	0.1001	0.1177	3.4791	3.7483	10.8199	10.8309
nurse 5	50	0.1	0.1216	2.7522	2.9811	10.9475	10.9595

## Sheet: calculations
Lipid Mass calculations													surface area: [(wax-dipped weight-initial weight)*59.2]+2.44
raw lipid yield (mg): 1000* (after weight)- (initial weight)-(blank weight)
total lipid content (mg): (raw lipid yield)*(total blastate volume)/(aliquot filtered)
final lipid content (mg/cm2): (total lipid content)/(surface area)														blank weight:	0.0008
sample #	blastate vol (mL)	aliquot filtered	filter initial	filter final	tissue dry weight	average tissue DW	skel initial	skel final	wax weight	surface area (cm2)	lipid initial	lipid final	raw lipid (mg)	total lipid (mg)	final lipid (mg/cm2)
initial 1	43	15	0.1024	0.1148	0.0124		1.114	1.2609	0.1469	11.1365	10.9683	10.9811	10970.1	31447.7	2823.85
initial 2	45	15	0.1021	0.1183	0.0162		1.3146	1.4896	0.175	12.8	11.0237	11.0339	11022.9	33068.6	2583.49
initial 3	50	15	0.1033	0.1268	0.0235	0.0187	1.4907	1.6657	0.175	12.8	11.0123	11.0255	11014.5	36715	2868.36
initial 4	43	15	0.1032	0.1231	0.0199		1.756	1.9186	0.1626	12.0659	10.7857	10.7978	10787	30922.8	2562.82
initial 5	50	15	0.1023	0.1238	0.0215		1.5247	1.6721	0.1474	11.1661	11.0652	11.0802	11069.1	36897.1	3304.39
dict 1	53	15	0.1031	0.1174	0.0143		2.7518	3.0283	0.2765	18.8088	11.0593	11.0847	11073.6	39126.9	2080.24
dict 2	53	15	0.1019	0.1188	0.0169		3.4581	3.7358	0.2777	18.8798	11.1228	11.143	11131.9	39332.6	2083.31
dict 3	55	15	0.1041	0.1209	0.0168	0.018	2.8146	3.0729	0.2583	17.7314	10.977	10.9881	10977.1	40249.4	2269.96
dict 4	55	15	0.1039	0.1214	0.0175		2.6217	2.8663	0.2446	16.9203	10.9353	11.1091	11098.2	40693.3	2404.99
dict 5	52	15	0.1038	0.1283	0.0245		1.5467	1.7694	0.2227	15.6238	10.8127	10.8257	10814.9	37491.6	2399.64
starve 1	53	15	0.102	0.1229	0.0209		3.2877	3.5936	0.3059	20.5493	11.0067	11.0155	11004.5	38882.5	1892.16
starve 2	50	15	0.1044	0.1255	0.0211		2.505	2.7259	0.2209	15.5173	10.9723	10.9841	10973.1	36577.1	2357.18
starve 3	50	15	0.1023	0.128	0.0257	0.0206	1.6759	1.8047	0.1288	10.065	10.9828	11.0184	11007.4	36691.4	3645.46
starve 4	50	15	0.1031	0.1211	0.018		1.2449	1.4194	0.1745	12.7704	11.0112	11.0171	11006.1	36687	2872.81
starve 5	50	15	0.1051	0.1224	0.0173		1.9847	2.1576	0.1729	12.6757	10.8801	10.8945	10883.6	36278.7	2862.07
fed 1	46	15	0.0995	0.1124	0.0129		2.4123	2.6279	0.2156	15.2035	10.8701	10.877	10866.1	33322.8	2191.78
fed 2	52	15	0.0998	0.1227	0.0229		4.5858	4.8714	0.2856	19.3475	11.1427	11.1549	11143.8	38631.7	1996.73
fed 3	50	15	0.0999	0.1192	0.0193	0.01734	1.5104	1.7021	0.1917	13.7886	10.9569	10.9651	10954.1	36513.8	2648.11
fed 4	55	15	0.0999	0.1166	0.0167		3.2987	3.5787	0.28	19.016	10.8024	10.8098	10799	39596.3	2082.26
fed 5	50	15	0.0991	0.114	0.0149		2.7891	3.0214	0.2323	16.1922	10.9277	10.9367	10925.8	36419.2	2249.19
nurse 1	55	15	0.1002	0.1245	0.0243		2.8453	3.0884	0.2431	16.8315	10.7902	10.8064	10795.6	39583.9	2351.77
nurse 2	55	15	0.0996	0.1253	0.0257		2.7693	3.0367	0.2674	18.2701	10.9199	10.9343	10923.4	40052.4	2192.24
nurse 3	55	15	0.0993	0.12	0.0207	0.02198	1.9782	2.2034	0.2252	15.7718	10.7151	10.7263	10715.6	39290.5	2491.18
nurse 4	52	15	0.1001	0.1177	0.0176		3.4791	3.7483	0.2692	18.3766	10.8199	10.8309	10820.1	37509.6	2041.16
nurse 5	50	15	0.1	0.1216	0.0216		2.7522	2.9811	0.2289	15.9909	10.9475	10.9595	10948.6	36495.2	2282.25

## Sheet: graphs
sample #	final lipid		treatment	average final lipid content	sd	se						For Conditioning Section
initial 1	2823.85		Initial	2828.58	299.459	133.922
initial 2	2583.49		dictyota	2247.63	160.77	71.8985
initial 3	2868.36		Unfed	2725.94	655.131	292.983
initial 4	2562.82		Fed	2233.61	251.406	112.432
initial 5	3304.39		Nursery	2271.72	168.936	75.5506
dict 1	2080.24
dict 2	2083.31
dict 3	2269.96		Initial	2828.58	133.922
dict 4	2404.99		Unfed	2725.94	292.983
dict 5	2399.64		Fed/RC	2233.61	112.432
starve 1	1892.16		Fed/Dict	2247.63	71.8985
starve 2	2357.18
starve 3	3645.46
starve 4	2872.81
starve 5	2862.07
fed 1	2191.78
fed 2	1996.73			ANOVA Results: there is a significant difference in average final lipid content among the treatments
fed 3	2648.11			Response: final.lipid
fed 4	2082.26			Df Sum Sq Mean Sq F value Pr(>F)								For Dictyota Feeding Section
fed 5	2249.19			Sample 4 1691822 422956 3.3227 0.03057 *
nurse 1	2351.77			Residuals 20 2545854 127293
nurse 2	2192.24
nurse 3	2491.18			TukeyHSD did not find significant differences among groups
nurse 4	2041.16
nurse 5	2282.25
