# Supplementary material for: Dictyota defense: Developing effective chemical protection against intense fish predation for outplanted massive corals
Source: PeerJ. 2023 Mar 8;11:e14995. doi: 10.7717/peerj.14995 (PMC10007969; doi:10.7717/peerj.14995)
Supplement: Supplemental Information 6 — These data represent the protein concentrations of the coral tissue samples among the different treatment types. Protein concentration was calculated from the resulting values of the protein assay using the equations provided by ThermoScientific. [file peerj-11-14995-s006.xlsx]

## Sheet: Standards
standards
	SAMPLE	CONCENTRATION	BACKCALCCONC	WELLS	VALUE	MEAN VALUE	SD	CV
	A	2000	2009.81		1.92	1.922	0.004	0.2
	A	2000	2016.16		1.925
	B	1500	893.782		0.954	1.256	0.427	34
	B	1500	1591.41		1.558
	C	1000	1269.87		1.279	1.233	0.066	5.4
	C	1000	1161.69		1.186
	D	750	927.531		0.983	0.986	0.004	0.4
	D	750	934.234		0.989
	E	500	540.228		0.648	0.658	0.014	2.1
	E	500	562.535		0.667
	F	250	195.825		0.35	0.357	0.01	2.7
	F	250	211.524		0.364
	G	125	64.508		0.237	0.254	0.0025	9.8
	G	125	105.308		0.272
	H	25	-1.256		0.18	0.188	0.012	6.6
	H	25	19.086		0.197
	I	0	-6.919		0.175	0.093	0.115	123.5
	I	0	-195.311		0.012

## Sheet: Unknowns
	SAMPLE	VALUE	RESULT	MEANRESULT	SD	CV
	D1	0.24	35.053	57.799	32	55.7
	D1	0.267	80.545
	D2	0.346	214.822	215.414	0.837	0.4
	D2	0.347	216.006
	D3	0.27	85.618	75.979	13	17.9
	D3	0.258	66.339
	D4	0.274	93.905	118.173	34	29
	D4	0.303	142.441
	D5	0.275	94.074	120.71	37	31.2
	D5	0.306	147.345
	F1	0.266	79.023	73.019	8.49	11.6
	F1	0.259	67.016
	F2	0.219	0.553	67.608	94	140.3
	F2	0.298	134.662
	F3	0.316	164.426	143.54	29	20.6
	F3	0.291	122.655
	F4	0.313	159.014	148.952	14	9.6
	F4	0.301	138.89
	F5	0.264	75.641	73.611	2.87	3.9
	F5	0.261	71.582
	I1	0.253	56.869	148.868	130	87.4
	I1	0.361	240.866
	I3	0.248	49.259	81.813	46	56.3
	I3	0.286	114.368
	I4	0.289	118.427	161.382	60	37.6
	I4	0.34	204.337
	I5	0.249	50.95	129.25	110	85.7
	I5	0.342	207.551
	NU1	0.266	79.361	134.831	78	58.2
	NU1	0.331	190.301
	NU2	0.356	231.227	279.171	67	24.3
	NU2	0.412	327.115
	NU3	0.287	116.059	105.912	14	13.5
	NU3	0.276	95.765
	NU4	0.242	38.604	43.847	7.414	16.9
	NU4	0.248	49.09
	NU5	0.249	51.795	57.376	7.892	13.8
	NU5	0.256	62.957
	S1	0.334	195.205	181.845	18	10.4
	S1	0.319	168.485
	S2	0.308	150.39	156.055	8.012	5.1
	S2	0.315	161.72
	S3	0.313	159.86	174.066	20	11.5
	S3	0.33	188.271
	S4	0.217	-3.674	-8.241	6.457	78.4
	S4	0.211	-12.807
	S5	0.231	20.171	36.998	23	64.3
	S5	0.251	53.825

## Sheet: STD Curve
blank standard absorbance	0.093
standard/unknown	value	blank corrected value		Avg blank corrected				standard curve
A	1.92	1.827		1.8295				SAMPLE	CONC	VALUE
A	1.925	1.832						A	2000	1.8295
B	0.954	0.861		1.163				B	1500	1.163
B	1.558	1.465						C	1000	1.1395
C	1.279	1.186		1.1395				D	750	0.893
C	1.186	1.093						E	500	0.5645
D	0.983	0.89		0.893				F	250	0.264
D	0.989	0.896						G	125	0.1615
E	0.648	0.555		0.5645				H	25	0.0955
E	0.667	0.574
F	0.35	0.257		0.264
F	0.364	0.271
G	0.237	0.144		0.1615
G	0.272	0.179
H	0.18	0.087		0.0955
H	0.197	0.104
D1	0.24	0.147		0.1605
D1	0.267	0.174
D2	0.346	0.253		0.2535						y	absorbance
D2	0.347	0.254								x	concentration
D3	0.27	0.177		0.171
D3	0.258	0.165								y=0.0008x+0.1138
D4	0.274	0.181		0.1955						x=(y-0.1138)/0.0008
D4	0.303	0.21
D5	0.275	0.182		0.1975
D5	0.306	0.213
F1	0.266	0.173		0.1695
F1	0.259	0.166
F2	0.219	0.126		0.1655
F2	0.298	0.205
F3	0.316	0.223		0.2105
F3	0.291	0.198
F4	0.313	0.22		0.214
F4	0.301	0.208
F5	0.264	0.171		0.1695
F5	0.261	0.168
I1	0.253	0.16		0.214
I1	0.361	0.268
I3	0.248	0.155		0.174
I3	0.286	0.193
I4	0.289	0.196		0.2215
I4	0.34	0.247
I5	0.249	0.156		0.2025
I5	0.342	0.249
NU1	0.266	0.173		0.2055
NU1	0.331	0.238
NU2	0.356	0.263		0.291
NU2	0.412	0.319
NU3	0.287	0.194		0.1885
NU3	0.276	0.183
NU4	0.242	0.149		0.152
NU4	0.248	0.155
NU5	0.249	0.156		0.1595
NU5	0.256	0.163
S1	0.334	0.241		0.2335
S1	0.319	0.226
S2	0.308	0.215		0.2185
S2	0.315	0.222
S3	0.313	0.22		0.2285
S3	0.33	0.237
S4	0.217	0.124		0.121
S4	0.211	0.118
S5	0.231	0.138		0.148
S5	0.251	0.158

## Sheet: Protein Conc Calc
Sample	Absorb	Protein Conc			concentration=(absorbance-0.1138)/0.0008
D1	0.1605	58.375
D2	0.2535	174.625
D3	0.171	71.5
D4	0.1955	102.125
D5	0.1975	104.625
F1	0.1695	69.625
F2	0.1655	64.625
F3	0.2105	120.875
F4	0.214	125.25
F5	0.1695	69.625
I1	0.214	125.25
I3	0.174	75.25
I4	0.2215	134.625
I5	0.2025	110.875
NU1	0.2055	114.625
NU2	0.291	221.5
NU3	0.1885	93.375
NU4	0.152	47.75
NU5	0.1595	57.125
S1	0.2335	149.625
S2	0.2185	130.875
S3	0.2285	143.375
S4	0.121	9
S5	0.148	42.75

## Sheet: Sheet2
Sample	Protein Average	SD	SE		Initial	111.5	26.0658	13.0329				For Dictyota Feeding
Dictyota	102.25	45.0399	20.1425		Unfed	95.125	64.6858	28.9284
Fed	90	30.2903	13.5462		Fed/RC	90	30.2903	13.5462
Initial	111.5	26.0658	13.0329		Fed/Dict	102.25	45.0399	20.1425
Not Fed	95.125	64.6858	28.9284
			ANOVA results- no significant difference in protein concentration
				Df Sum Sq Mean Sq F value Pr(>F)
				Sample 4 1397 349.3 0.133 0.968
				Residuals 19 49912 2626.9
												For Coral Conditioning
Sample	Protein Average	SD	SE
Initial	111.5	26.0658	13.0329
Unfed	95.125	64.6858	28.9284
Fed	90	30.2903	13.5462
Nursery	106.875	69.5558	31.1063
